# Supplementary material
Source: publisher figshare collection journal article supplement (https://karger.figshare.com/articles/dataset/_/4539856)
Supplement: Supplementary file 1 [file 2]

**Supplementary Table 3: Summary of Nivolumab related renal toxicities**

| <i>Publication</i> | <i>Patient Number</i> | <i>Time of onset of renal dysfunction in reference to starting Nivolumab</i>                                                            | <i>Type of Cancer</i> | <i>Age(y)</i> | <i>Gender</i> | <i>Renal Pathology</i>                                       | <i>Renal Outcomes</i>                                                               | <i>Cancer Outcome</i> |
|--------------------|-----------------------|-----------------------------------------------------------------------------------------------------------------------------------------|-----------------------|---------------|---------------|--------------------------------------------------------------|-------------------------------------------------------------------------------------|-----------------------|
| Shirali et al      | 1                     | 11 months following treatment and the creatinine rose to 1.9 mg/dl. (Baseline creatinine 1.2mg/dl)                                      | NSCLC                 | 73            | Male          | Focal AIN                                                    | Creatinine normalized after stopping drug                                           | Disease progression   |
| Shirali et al      | 2                     | 10months following treatment, creatinine rose to 1.8 mg/dl (Baseline creatinine 0.9mg/dl)                                               | NSCLC                 | 78            | Male          | Diffuse AIN, eosinophil infiltrates, arterio-nephrosclerosis | Creatinine normalized after stopping drug + 60mg Prednisone x 1 month               | Disease progression   |
| Shirali et al      | 3                     | 10months following treatment with drug + Bevacizumab, creatinine rose to 5.5mg/dl , with fever and rash (Baseline creatinine 0.9mg/dl), | NSCLC                 | 60            | Female        | Diffuse AIN with diffuse podocyte effacement                 | Creatinine normalized with stopping both drugs +Solumedrol then Prednisone x1 month | Stable disease        |

Supplementary Online Appendix for article for Wanchoo R et al. " Adverse Renal Effects of Immune Check Point Inhibitors: A Narrative Review."

|                |   |                                                            |                     |    |        |               |                                                                                                            |                     |
|----------------|---|------------------------------------------------------------|---------------------|----|--------|---------------|------------------------------------------------------------------------------------------------------------|---------------------|
| Vandiver et al | 4 | Immediately after infusion, developed hyponatremia and AKI | Metastatic Melanoma | 58 | Female | Not performed | Empiric steroids given and fluid restriction and tolvaptan-creatinine normalized and hyponatremia resolved | Disease progression |
| Cortazar et al | 5 | 10 months following treatment                              | Metastatic Melanoma | 71 | Male   | Diffuse AIN   | Steroids given but no recovery                                                                             | NA                  |

AIN: acute interstitial nephritis; AKI: Acute kidney injury; NSCLC: Non small cell lung cancer; NA: Not available
