# Supplementary material
Source: publisher figshare collection journal article supplement (https://karger.figshare.com/articles/dataset/_/4539856)
Supplement: Supplementary file 2 [file 2]

**Supplementary Table 1:** Summary of Ipilimumab related renal toxicities

| <i>Reference</i> | <i>Patient Number</i> | <i>Time of onset of renal dysfunction in reference to starting Ipilimumab</i>                                                                                       | <i>Type of Cancer</i> | <i>Age(years)</i> | <i>Gender</i> | <i>Renal Pathology</i>               | <i>Renal Outcomes</i>                                                                            | <i>Cancer Outcome</i>                                                    |
|------------------|-----------------------|---------------------------------------------------------------------------------------------------------------------------------------------------------------------|-----------------------|-------------------|---------------|--------------------------------------|--------------------------------------------------------------------------------------------------|--------------------------------------------------------------------------|
| Thajudeen et al  | 1                     | 12 weeks following treatment, developed rash, transaminitis and worsening renal failure with elevation of creatinine to 2.2mg/dl (baseline creatinine 1.1-1.2mg/dl) | Metastatic melanoma   | 74                | Male          | Granulomatous interstitial nephritis | Drug discontinued and steroid taper initiated, renal function stabilized at 1.4 mg/dl in 4 weeks | Unknown<br>Drug was restarted 2 months after stabilization of creatinine |
| Izzedine et al   | 2                     | 6 weeks following treatment, creatinine increased to 2.33 (baseline creatinine 0.68)<br>Later diagnosed as DRESS                                                    | Metastatic melanoma   | 78                | Male          | Granulomatous interstitial nephritis | After 6 weeks of steroid taper, creatinine decreased to 1.0mg/dl                                 | 40% tumor reduction                                                      |

|                |   |                                                                                                              |                     |    |        |                                                                                                                      |                                                                                                                                                                                |         |
|----------------|---|--------------------------------------------------------------------------------------------------------------|---------------------|----|--------|----------------------------------------------------------------------------------------------------------------------|--------------------------------------------------------------------------------------------------------------------------------------------------------------------------------|---------|
| Izzedine et al | 3 | 6 weeks following treatment, noted to have AKI with elevation in creatinine to 3.06mg/dl (baseline 1.0mg/dl) | Metastatic melanoma | 60 | Female | Granulomatous interstitial nephritis<br><br>(AIN with some ATN patterns and 2 non necrotizing epitheloid granulomas) | After 8 weeks of steroid taper, creatinine decreased to 1.3mg/dl                                                                                                               | Unknown |
| Fadel et al    | 4 | 6 weeks following treatment, presented with nephrotic syndrome (baseline creatinine was 1.0mg/dl)            | Metastatic melanoma | 64 | Male   | Secondary immune complex membranous nephropathy( lupus like features)                                                | Drug discontinued and steroid taper initiated. Resolved at 12 months<br>Circulating anti dsDNA antibodies appeared concomitantly and regressed after ipilimumab was withdrawn. | Unknown |

|               |   |                                                                                                                                                                                        |                     |    |        |                                 |                                                                                         |                                                                                                                                |
|---------------|---|----------------------------------------------------------------------------------------------------------------------------------------------------------------------------------------|---------------------|----|--------|---------------------------------|-----------------------------------------------------------------------------------------|--------------------------------------------------------------------------------------------------------------------------------|
| Forde et al   | 5 | 12 weeks following treatment, presented with oliguric AKI with creatinine elevated at 1.66mg/dl (baseline creatinine was 0.6mg/dl). Also had granular casts on urine sediment analysis | Metastatic melanoma | 59 | Male   | Biopsy not performed            | Creatinine decreased to 0.7mg/dl after 1 week of steroid treatment                      | Complete response                                                                                                              |
| Voskens et al | 6 | 8 weeks following treatment, presented with AKI with creatinine elevated to 4.3 mg/dl (baseline creatinine <1.2)                                                                       | Metastatic melanoma | 53 | Female | Result of biopsy unavailable    | Drug was stopped and steroids were initiated. AKI resolved with steroids                | Complete regression of most melanoma metastases, Stable metastatic disease in left kidney, Disease progression in right kidney |
| Kidd et al    | 7 | Unclear time course but presented with nephrotic syndrome and elevation of creatinine to 2.97mg/dl (baseline                                                                           | Metastatic melanoma | 55 | Male   | Minimal change disease<br>+ AIN | With high dose steroid therapy, renal function improved and nephrotic syndrome resolved | Unknown                                                                                                                        |

|                    |   |                                                                                                                        |                                 |    |        |    |                                                                                                   |         |
|--------------------|---|------------------------------------------------------------------------------------------------------------------------|---------------------------------|----|--------|----|---------------------------------------------------------------------------------------------------|---------|
|                    |   | creatinine<br>1.2mg/dl)                                                                                                |                                 |    |        |    |                                                                                                   |         |
| Barnard et al      | 8 | 8 weeks following treatment, noted to have hyponatremia due to panhypopituitarism from ipilimumab related hypophysitis | Metastatic melanoma             | 75 | Female | NA | Resolution of hyponatremia after treatment with steroids, fluid restriction and hypertonic saline | Unknown |
| Chodakiewicz et al | 9 | 8 weeks following treatment, hyponatremia due to panhypopituitarism from ipilimumab related hypophysitis               | Metastatic BRAF mutant melanoma | 65 | Female | NA | Sodium levels improved with IV normal saline and dexamethasone                                    | Unknown |

|                |    |                                            |                   |    |        |                   |                                                                                    |    |
|----------------|----|--------------------------------------------|-------------------|----|--------|-------------------|------------------------------------------------------------------------------------|----|
| Cortazar et al | 10 | 8 weeks following initiation of treatment  | Melanoma          | 70 | Male   | Granulomatous AIN | Partial recovery of renal function and then started on Pembrolizumab with no AKI   | NA |
| Cortazar et al | 11 | 10 weeks following initiation of treatment | Melanoma          | 62 | Female | AIN               | Got conservative management and no steroids- no recovery and was not re-challenged | NA |
| Cortazar et al | 12 | 26 weeks following initiation of treatment | Pancreatic cancer | 64 | Male   | AIN               | Dialysis dependent on start of AKI, Got steroids and no recovery                   | NA |

|                |    |                                            |                  |    |        |                            |                                                                 |    |
|----------------|----|--------------------------------------------|------------------|----|--------|----------------------------|-----------------------------------------------------------------|----|
| Cortazar et al | 13 | 22 weeks following initiation of treatment | Melanoma         | 58 | Male   | Thrombotic microangiopathy | Needed HD in few weeks following AKI, Got steroids, no recovery | NA |
| Cortazar et al | 14 | 12 weeks following treatment               | Hodgkin Lymphoma | 32 | Female | AIN                        | Got conservative management and no recovery                     | NA |
| Cortazar et al | 15 | 8 weeks following treatment                | Melanoma         | 73 | Female | AIN                        | Steroid given, partial recovery                                 | NA |

ATN: Acute tubular necrosis; AKI: Acute kidney injury; NA: Not available
