# Supplementary material
Source: publisher figshare collection journal article supplement (https://karger.figshare.com/articles/dataset/_/4539856)
Supplement: Supplementary file 3 [file 2]

Supplementary Table 5: Summary of patients on immune check point inhibitors and renal transplantation

| <i>Publication</i> | <i>Therapy</i> | <i>Time of onset of renal dysfunction in reference to starting</i> | <i>History of any prior cancers</i> | <i>Type of Cancer</i> | <i>Age</i> | <i>Gender</i> | <i>Renal Pathology</i> | <i>Renal transplant information</i>                                                   | <i>Renal Outcomes</i>                                      | <i>Cancer Outcome</i>      |
|--------------------|----------------|--------------------------------------------------------------------|-------------------------------------|-----------------------|------------|---------------|------------------------|---------------------------------------------------------------------------------------|------------------------------------------------------------|----------------------------|
| Lipson et al       | Ipilimumab     | No AKI with creatinine stable at 1.2mg/dl                          | None                                | Metastatic Melanoma   | 72         | Male          | NA                     | DDRT 2000( tacrolimus and prednisone)<br><br>Tacrolimus was discontinued              | Continued to remain stable on the agent even after 2 years | Continued partial response |
| Lipson et al       | Ipilimumab     | No AKI with creatinine stable at 2.0mg/dl                          | None                                | Metastatic Melanoma   | 58         | Male          | NA                     | DDRT 2004( MMF, tacrolimus and prednisone)<br><br>MMF and tacrolimus was discontinued | Continued to remain stable                                 |                            |

Supplementary Online Appendix for article for Wanchoo R et al. " Adverse Renal Effects of Immune Check Point Inhibitors: A Narrative Review."

|               |                                                                                                  |                                                                                                                                                                                |                                                                                 |                     |    |        |                                                          |                                                                                |                                                                       |                          |
|---------------|--------------------------------------------------------------------------------------------------|--------------------------------------------------------------------------------------------------------------------------------------------------------------------------------|---------------------------------------------------------------------------------|---------------------|----|--------|----------------------------------------------------------|--------------------------------------------------------------------------------|-----------------------------------------------------------------------|--------------------------|
| Alhamad et al | Ipilimumab followed by pembrolizumab                                                             | 5 weeks after last dose of ipilimumab and 3 weeks following last dose of pembrolizumab presented with AKI and a serum creatinine of 8.7 mg/dl ( baseline creatinine 1.1mg/dl ) | Yes, SCC in 2004 for which patient got carboplatin/paclitaxel and good response | Metastatic Melanoma | 68 | Male   | Mixed cellular active and antibody rejection (BANFF IIA) | DDRT 2000( cyclosporine, prednisone)<br><br>Cyclosporine discontinued          | Steroids tried and low dose tacrolimus but hemodialysis was initiated | Information not provided |
| Spain et al   | Ipilimumab followed by nivolumab                                                                 | 5 weeks after ipilimumab and 1 week after last dose of nivolumab                                                                                                               | None                                                                            | Metastatic Melanoma | 48 | Male   | Acute cellular rejection BANFF IIA                       | DDRT 2001( prednisone, tacrolimus)<br><br>Tacrolimus stopped                   | Started steroids and hemodialysis                                     | Disease progression      |
| Lipson et al  | Pembrolizumab<br><br>For the same cancer was tried on cetuximab, and trametinib with no response | AKI after 8 weeks                                                                                                                                                              | None                                                                            | SCC                 | 57 | Female | Acute cellular rejection                                 | DDRT(1989) on prednisone and cyclosporine<br><br>Cyclosporine was discontinued | Started hemodialysis                                                  | 85% reduction in tumor   |

Supplementary Online Appendix for article for Wanchoo R et al. " Adverse Renal Effects of Immune Check Point Inhibitors: A Narrative Review."

|               |           |                   |      |                                    |    |      |                                       |                                                                           |                                                                         |                          |
|---------------|-----------|-------------------|------|------------------------------------|----|------|---------------------------------------|---------------------------------------------------------------------------|-------------------------------------------------------------------------|--------------------------|
| Bolis et al.  | Nivolumab | AKI after 6 weeks | None | Non Small cell lung cancer of lung | 75 | Male | Acute cellular rejection ( BANFF IIB) | Not mentioned which form of transplant but on cyclosporine and prednisone | Prednisone and dialysis                                                 | Information not provided |
| Barnett et al | Nivolumab | No AKI            | None | Duodenal cancer                    | 70 | Male | No                                    | LRRT(2010)                                                                | Preventive prednisone and sirolimus given ( tacrolimus and MMF stopped) | 85% reduction of tumor   |

**AKI: Acute kidney injury, DDRT: Deceased Donor renal transplant, SCC: squamous cell carcinoma; LRRT: living related renal transplant**
