# Supplementary material
Source: publisher figshare collection journal article supplement (https://karger.figshare.com/articles/dataset/_/4539856)
Supplement: Supplementary file 4 [file 2]

**Supplementary Table 2:** Summary of Pembrolizumab related renal toxicities

| <i>Publication</i> | <i>Patient Number</i> | <i>Time of onset of renal dysfunction in reference to starting Pembrolizumab</i>                                 | <i>Type of Cancer</i>         | <i>Age(y)</i> | <i>Gender</i> | <i>Renal Pathology</i> | <i>Renal Outcomes</i>                                                                                                                                                                                                                 | <i>Cancer Outcome</i> |
|--------------------|-----------------------|------------------------------------------------------------------------------------------------------------------|-------------------------------|---------------|---------------|------------------------|---------------------------------------------------------------------------------------------------------------------------------------------------------------------------------------------------------------------------------------|-----------------------|
| Shirali et al      | 1                     | 3 months following treatment, presented with AKI and Scr elevated at 1.9mg/dl ( baseline creatinine of 1.0mg/dl) | NSCLC Advanced Adenocarcinoma | 69            | Female        | AIN                    | With discontinuation of drug and 4 week steroid taper, creatinine decreased to 1.3mg/dl. It rose to 2.5mg/dl two weeks later when drug re-introduced. Steroids restarted and creatinine back to baseline after 3 months steroid taper | Not known             |
| Shirali et al      | 2                     | 12 months following treatment, presented with AKI with creatinine elevated at 2.3 mg/dl ( baseline 0.8mg/dl)     | NSCLC Advanced Adenocarcinoma | 69            | Female        | AIN                    | Drug was stopped, serum creatinine normalized after one month of steroid taper                                                                                                                                                        | Sustained response    |
| Le Min et al       | 3                     | 15 months following treatment, presented with rhabdomyolysis and AKI                                             | Metastatic melanoma           | 49            | Male          | No biopsy performed    | Confounding factor: hypothyroidism as AKI and rhabdomyolysis resolved with levothyroxine                                                                                                                                              | Complete response     |

Supplementary Online Appendix for article for  
Wanchoo R et al. “ Adverse Renal Effects of Immune Check Point Inhibitors: A Narrative Review.”

|                |   |                              |                |    |        |     |                                                                                       |    |
|----------------|---|------------------------------|----------------|----|--------|-----|---------------------------------------------------------------------------------------|----|
| Cortazar et al | 4 | 1 month following treatment  | Bladder Cancer | 66 | Male   | AIN | Got steroids, required dialysis for sometime but partial recovery and no re-challenge | NA |
| Cortazar et al | 5 | 8 months following treatment | Melanoma       | 41 | Female | AIN | Got steroids, with complete recovery                                                  | NA |

AIN: acute interstitial nephritis; AKI: Acute kidney injury; NSCLC: Non small cell lung cancer; NA: Not available
