# Supplementary material
Source: publisher figshare collection journal article supplement (https://karger.figshare.com/articles/dataset/_/4539856)
Supplement: Supplementary file 5 [file 2]

**Supplementary Table 4** Summary of combined CTLA-4 and PD-1 inhibitor therapy related renal toxicities

| <i>Publication</i> | <i>Patient Number</i> | <i>Regimen</i> | <i>Time of onset</i> | <i>Type of Cancer</i> | <i>Age (y)</i> | <i>Gender</i> | <i>Renal Pathology</i> | <i>Renal Outcomes</i>                                      | <i>Cancer Outcome</i> |
|--------------------|-----------------------|----------------|----------------------|-----------------------|----------------|---------------|------------------------|------------------------------------------------------------|-----------------------|
| Cortazar et al     | 1                     | Ipi + Nivo     | 12 weeks             | Melanoma              | 64             | Male          | Granulomatous AIN      | Steroids given with complete recovery                      | NA                    |
| Cortazar et al     | 2                     | Ipi +Nivo      | 10 weeks             | Melanoma              | 74             | Male          | Granulomatous AIN      | Partial recovery with steroids and needed dialysis as well | NA                    |
| Cortazar et al     | 3                     | Ipi+Nivo       | 33 weeks             | Melanoma              | 71             | Male          | Diffuse AIN            | Partial recovery with steroids                             | NA                    |
| Cortazar et al     | 4                     | Ipi+Nivo       | 7 weeks              | Melanoma              | 75             | Male          | Diffuse AIN            | Partial recovery with steroids                             | NA                    |
| Murakami et al     | 5                     | Ipi+Nivo       | 5 weeks              | Melanoma              | 75             | Male          | Diffuse AIN            | Partial recovery with steroids                             | NA                    |



Supplementary Online Appendix for article for Wanchoo R et al. " Adverse Renal Effects of Immune Check Point Inhibitors: A Narrative Review."

|               |   |          |          |       |    |      |                                  |                                                                                                                                                                                                              |    |
|---------------|---|----------|----------|-------|----|------|----------------------------------|--------------------------------------------------------------------------------------------------------------------------------------------------------------------------------------------------------------|----|
| Shirali et al | 6 | Ipi+Nivo | 6 months | NSCLC | 59 | Male | Focal AIN, tubular vacuolization | <p>Creatinine 1.3mg/dl after discontinuation of both agents</p> <p>Creatinine 10.4mg/dl when nivolumab restarted 2 months later, Treatment: Steroids for 1 month, serum creatinine decreased to 1.4mg/dl</p> | NA |
|---------------|---|----------|----------|-------|----|------|----------------------------------|--------------------------------------------------------------------------------------------------------------------------------------------------------------------------------------------------------------|----|

AIN: acute interstitial nephritis; AKI: Acute kidney injury; Nivo: Nivolumab, Ipi: Ipilimumab; NA: Not available
